# Supplementary material
Source: PubMed Central journal article supplement (PMC7269995)
Supplement: ajtr0012-2241-f8.pdf [file ajtr0012-2241-f8.pdf]

# LINC00152 promotes PC development through miR-150

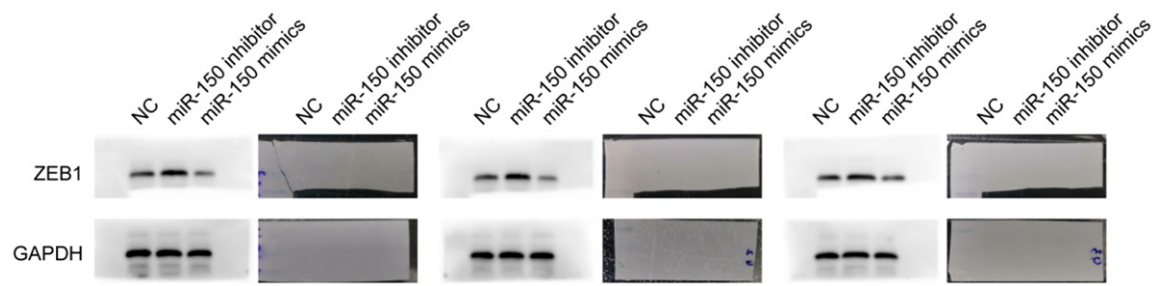

**Supplementary Figure 1.** The original western blot images of **Figure 6D**. Western blot assay was performed to measure the expression of ZEB1.
